# Supplementary material for: Decoding topologically associating domains with ultra-low resolution Hi-C data by graph structural entropy
Source: PubMed Central journal article supplement (PMC6093941; doi:10.1038/s41467-018-05691-7), 2018-08-15
Supplement: 41467_2018_5691_MOESM2_ESM.pdf [file 41467_2018_5691_MOESM2_ESM.pdf]

## **Description of Additional Supplementary Files**

**File Name:** Supplementary Data 1

**Description:** Predicted TADs.
